# Supplementary material
Source: ML conference proceedings conference paper supplement (https://openreview.net/forum?id=zeYaLS2tw5)
Supplement: supplementary_material [file attachment]

# Sparse Diffusion Policy: A Sparse, Reusable, and Flexible Policy for Robot Learning

Anonymous Author(s)

Affiliation

Address

email

## 1 Introduction

The supplement includes five videos and one description document. This document provides a detailed description of the supplementary materials for the manuscript entitled "Sparse Diffusion Policy: A Sparse, Reusable, and Flexible Policy for Robot Learning." The primary materials contained are as follows:

- **Sparsity of SDP.mp4** This video demonstrates the activation of experts across different layers within our Sparse Diffusion Policy (SDP) during task execution. It is evident that only a select few experts are activated during inference, showcasing the **sparsity** of SDP. This feature highlights SDP's efficiency in utilizing a few number of components to effectively perform tasks.
- **Multitask - Simulation.mp4** This video presents examples of our model policy across eight tasks in MimicGen [1], demonstrating the superior performance of the Sparse Diffusion Policy (SDP) in multitask learning.
- **Multitask - FANUC Robotic Arm.mp4** This video showcases our model policy implemented in four tasks during real robot experiments, specifically using the FANUC LR Mate 200iD/7L robotic arm. It demonstrates the superior performance of our SDP in real-world multitask learning.
- **Multitask - Comparison with TCD.mp4** This video presents a comparison between our framework, SDP, and the Task-Conditioned Diffusion (TCD) model in a real-world *Pick and Place* task experiment. It highlights the superior capability of SDP to preserve a multimodal policy capable of handling various types of tasks. Conversely, the baseline model struggles with completing all the tasks within a single model.
- **Task Transfer.mp4** This video corresponds to the experiment detailed in Section 4.3 of our study, illustrating the changes in selection probability among different experts when the Sparse Diffusion Policy (SDP) executes the *Coffee Preparation* task [1]. We observe that experts trained specifically on the *Coffee* task [1] are more likely to be selected when actions require information about the coffee machine. This finding provides valuable insights, suggesting that the combination of experts embodies distinct skills, and the router acts as a skill planner.

In the following sections, we provide detailed explanations for each video.

## 2 Sparsity of SDP

### 2.1 Sparsity of SDP.mp4

In this video, we display the activated experts in each layer of the Sparse Diffusion Policy (SDP) during task execution. We use an orange block to represent the top expert and a pink block for

35 the second highest-ranked expert. For clear illustration, we connect these blocks with arrows. It is  
36 important to note that in actual implementation, the contributions of the selected experts in each layer  
37 are weighted and summed according to the router’s weights (details are in Section 3.2 and Equation  
38 2). Considering that semantic features typically emerge in the final few diffusion timesteps within  
39 the computer vision domain [2, 3], we have selected the last fifth timestep of the diffusion model to  
40 visualize the results. From this video, we can see during the inference, activated experts are sparse  
41 which demonstrates the **sparsity** of our model.

## 42 **3 Multitask Learning**

### 43 **3.1 Multitask - Simulation.mp4**

44 In this video, we visualize the performance of our Sparse Diffusion Policy (SDP) across eight tasks  
45 in MimicGen [1]: *Square, Stack, Coffee, Hammer, Mug, Nut, Stack Three, and Thread*. The video  
46 demonstrates that SDP is capable of performing effectively in diverse different tasks.

### 47 **3.2 Multitask - FANUC Robotic Arm.mp4**

48 In this video, we visualize the performance of our Sparse Diffusion Policy (SDP) across three tasks  
49 in real robot experiments: *Push, Pick and Place, and Hang*. The *Hang* task involves two distinct  
50 goals: hanging a cup on a lower stick and hanging it on a higher stick. We collected 20 demonstra-  
51 tions for both the *Push* and *Pick and Place* tasks, and 40 demonstrations for the *Hang* task (20 for  
52 each goal). Our results demonstrate that SDP achieves superior performance in these tasks.

### 53 **3.3 Multitask - Comparison with TCD.mp4**

54 In this video, we compare the performance of our Sparse Diffusion Policy (SDP) with Task-  
55 Conditioned Diffusion (TCD) [4, 5]. Our SDP exhibits stable and precise performance across diverse  
56 tasks. In contrast, TCD struggles to capture the multimodality of the task-specific policies and dis-  
57 tinguish between different task behaviors, leading to failures. In detail, TCD always rotates the end  
58 effectors in the *Pick and Place* task, a behavior not observed in the demonstrations. Instead, rota-  
59 tions are necessary only for the *Hang* task. This observation indicates that TCD tends to conflate  
60 policies from different tasks and struggles to capture multimodal action distributions across diverse  
61 tasks.

## 62 **4 Task Transfer**

### 63 **4.1 Task Transfer.mp4**

64 This video illustrates the performance of our Sparse Diffusion Policy (SDP) in the *Coffee Prepa-*  
65 *ration* task [1] and the changes in expert selection probability during task execution. We initially  
66 trained our SDP on the *Coffee* and *Mug Cleanup* tasks [1]. Subsequently, we froze all the experts  
67 and trained a new, lightweight router (comprising less than 0.4% of the total parameters) specifically  
68 for the *Coffee Preparation* task.

69 In the *Coffee* task, the robot is required to place the pod into the holder and close it. For the *Mug*  
70 *Cleanup*, the robot must open a drawer, place the mug inside, and close the drawer. The *Coffee*  
71 *Preparation* task involves placing the mug into the drip tray, opening the holder, and the drawer,  
72 placing the pod into the holder, and then closing it. This task can be seen as a composite of the  
73 *Coffee* and *Mug Cleanup* tasks, but it includes unique actions, such as moving the mug to the drip  
74 tray, which are not present in the initial training tasks.

75 SDP thus needs to utilize the **frozen** experts developed for previous two tasks, and learn task-specific  
76 routers combining these to acquire new skills (e.g., moving the mug to the drip tray). To better  
77 illustrate the router’s functionality, we set eight experts per layer and selected only the top two

78 experts for activation, enabling the use of entirely distinct experts for *Coffee* and *Mug Cleanup*, with  
79 Mutual Information loss (described in Section 3.3). From Figure 6 in the manuscript, we observe  
80 that the *Coffee* task primarily activates experts 0127, while the *Mug Cleanup* task activates experts  
81 3456. It indicates that there are no shared experts in these two tasks. In the video, a light green area  
82 indicates the experts used for the *Coffee* task, and a light red area for the *Mug Cleanup*. According to  
83 the findings in [2, 3], We choose the last fifth diffusion timestep and the last layer of the transformer  
84 for visualization.

85 We observe that experts trained on the Coffee task are more likely to be selected when the task  
86 requires information about the coffee machine (not appear in the *Mug Cleanup* task). For instance,  
87 experts related to Coffee are activated (highlighted in red) when the action involves placing the pod.  
88 This observation underscores that the router acts as a skill planner, and experts function as the skills.  
89 The router can effectively composite the skills across the tasks and complete the complex and unseen  
90 tasks.

91 Interestingly, we find that **new skills** can be learned through the combination of experts from dif-  
92 ferent tasks. For example, when the robot moves the mug to the coffee machine’s drip tray—a  
93 new skill—it must ascertain the location of the coffee machine, prompting the activation of *Cof-*  
94 *fee*-related experts (highlighted in red). Another observation is that in most cases, experts from the  
95 *Mug Cleanup* are activated, showing that their combination is enough to address the majority of the  
96 *Coffee Preparation* task, except for actions that uniquely require information specific to the *Coffee*  
97 task. This demonstrates that such expert composition spans a broad range of skills, highlighting the  
98 powerful **expressive capability** of our SDP.

99 **References**

- 100 [1] A. Mandlekar, S. Nasiriany, B. Wen, I. Akinola, Y. Narang, L. Fan, Y. Zhu, and D. Fox. Mimic-  
101 gen: A data generation system for scalable robot learning using human demonstrations. In *7th*  
102 *Annual Conference on Robot Learning*, 2023.
- 103 [2] L. Tang, M. Jia, Q. Wang, C. P. Phoo, and B. Hariharan. Emergent correspondence from image  
104 diffusion. *Advances in Neural Information Processing Systems*, 36:1363–1389, 2023.
- 105 [3] G. Luo, L. Dunlap, D. H. Park, A. Holynski, and T. Darrell. Diffusion hyperfeatures: Searching  
106 through time and space for semantic correspondence. *Advances in Neural Information Process-*  
107 *ing Systems*, 36, 2024.
- 108 [4] A. Ajay, Y. Du, A. Gupta, J. Tenenbaum, T. Jaakkola, and P. Agrawal. Is conditional generative  
109 modeling all you need for decision-making? *arXiv preprint arXiv:2211.15657*, 2022.
- 110 [5] Z. Liang, Y. Mu, H. Ma, M. Tomizuka, M. Ding, and P. Luo. Skilldiffuser: Interpretable  
111 hierarchical planning via skill abstractions in diffusion-based task execution. *arXiv preprint*  
112 *arXiv:2312.11598*, 2023.
